# Supplementary material for: Coda-derived source properties estimated using local earthquakes in the Sea of Marmara, Türkiye
Source: Copernicus journal article supplement (doi:10.5194/egusphere-2024-721), 2024-05-15
Supplement: Supplementary file [file egusphere-2024-721-AC1-supplement.pdf]

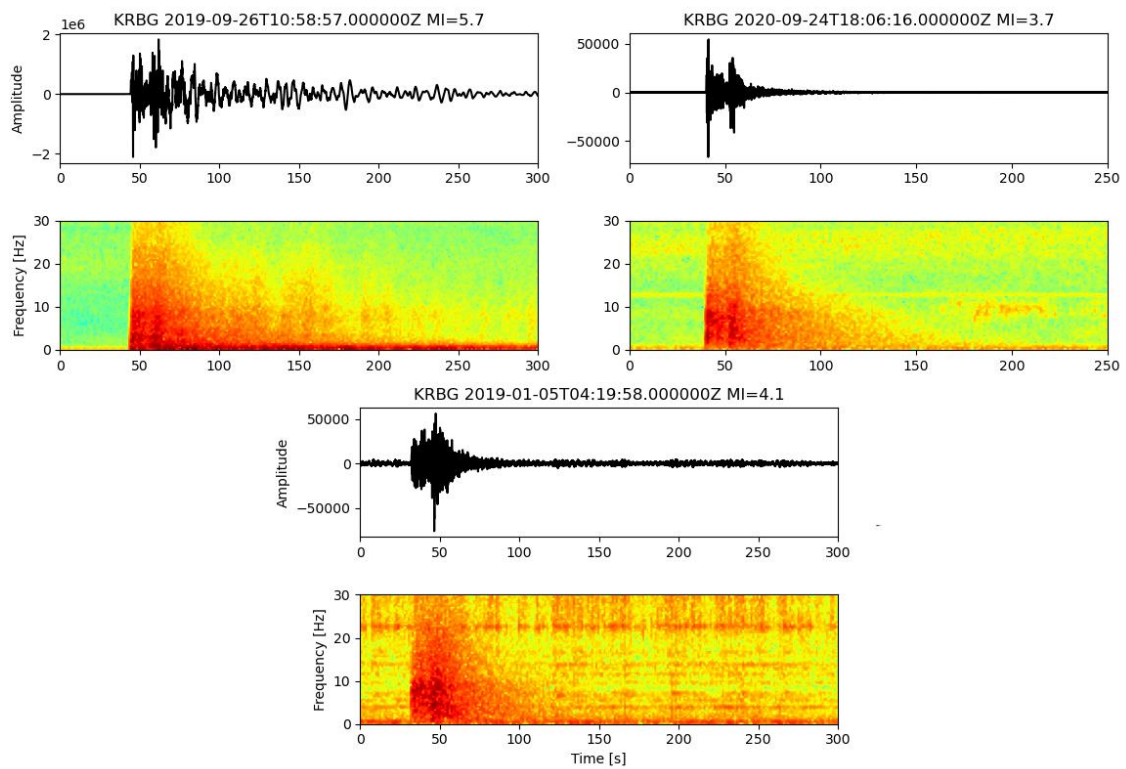

Figure R1. Example waveforms of the vertical component and corresponding spectrograms observed at station KRBG for 26 September 2019 ML=5.7 (top-left), 24 September 2020 ML=3.7 (top-right) and 5 January 2019 ML=4.1 (bottom) events.

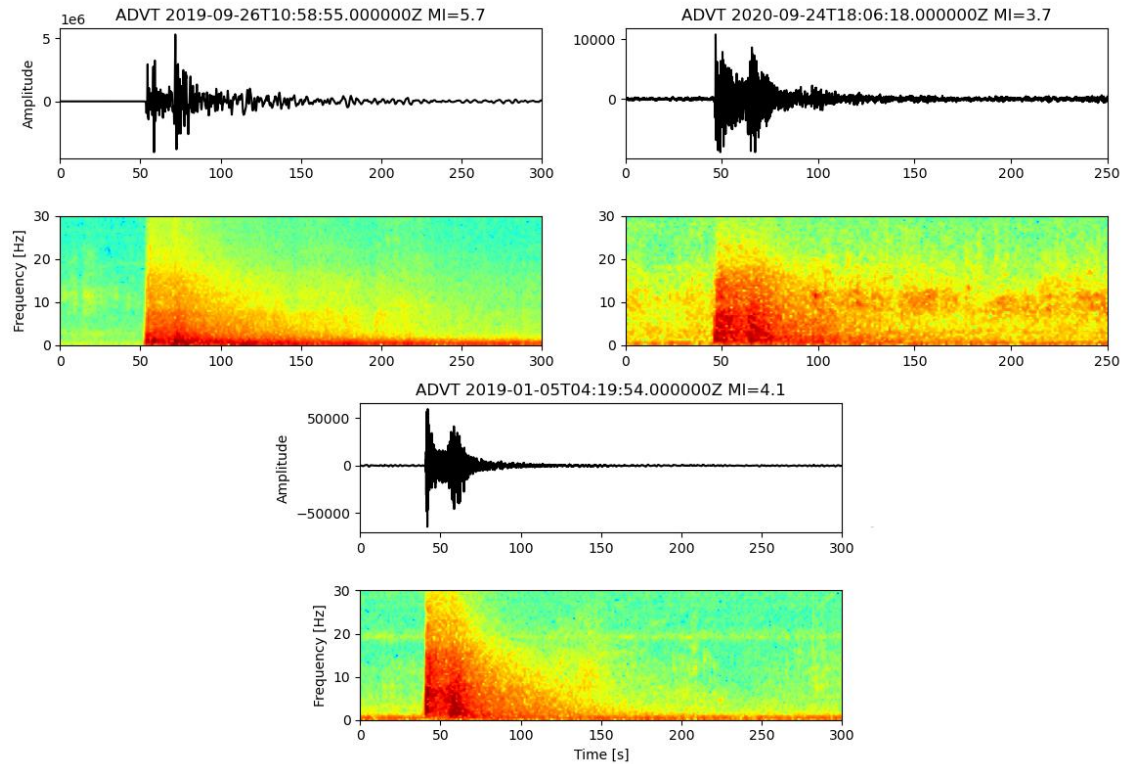

Figure R2. Example waveform of the vertical component and corresponding spectrograms observed at station ADVT for 26 September 2019 ML=5.7 (top-left), 24 September 2020 ML=3.7 (top-right) and 5 January 2019 ML=4.1 (bottom) events.
